# Supplementary material for: Amino Group-Driven Adsorption of Sodium p-Perfluorous Nonenoxybenzene Sulfonate in Water by the Modified Graphene Oxide
Source: MDPI journal article supplement (doi:10.3390/toxics12050343), 2024-05-08

## **Supporting Information**

### **Amino group-driven adsorption of sodium p-perfluorous nonenoxybenzene sulfonate in water by the modified graphene oxide**

Mengyuan Lu <sup>1, #</sup>, Yang Liu <sup>1, #, \*</sup>, Xinning Zheng <sup>2</sup>, Wenjuan Liu <sup>3</sup>, Yang Liu <sup>4</sup>, Jia Bao <sup>1, \*</sup>, Ao Feng <sup>1</sup>, Yueyao Bao <sup>1</sup>, Jiangyong Diao <sup>5</sup> and Hongyang Liu <sup>5</sup>

<sup>1</sup> School of Environmental and Chemical Engineering, Shenyang University of Technology, Shenyang 110870, China;

<sup>2</sup> Shenyang Zhenxing Sewage Treatment Co., LTD, Shenyang 110143, China;

<sup>3</sup> Dalian Xigang District Center for Disease Control and Prevention, Dalian 116021, China;

<sup>4</sup> Shenyang Hoper Group CO., LTD, Shenyang 110112, China;

<sup>5</sup> Shenyang National Laboratory for Materials Science, Institute of Metal Research, Chinese Academy of Sciences, Shenyang 110016, China

\* Correspondence: liuyang@sut.edu.cn (Y.L.); baojia@sut.edu.cn (J.B.)

# Both authors contributed equally to this paper.

**Figure S1.** Geometry optimization of GH-OBS solution (a), GO-OBS solution (b), and CS-GO-OBS solution (c)

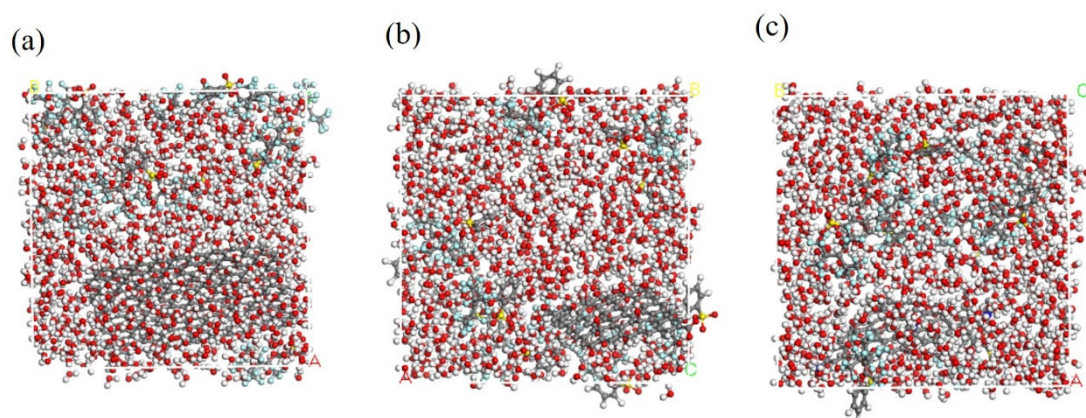

**Figure S2.** MSD trajectories of three different solutions

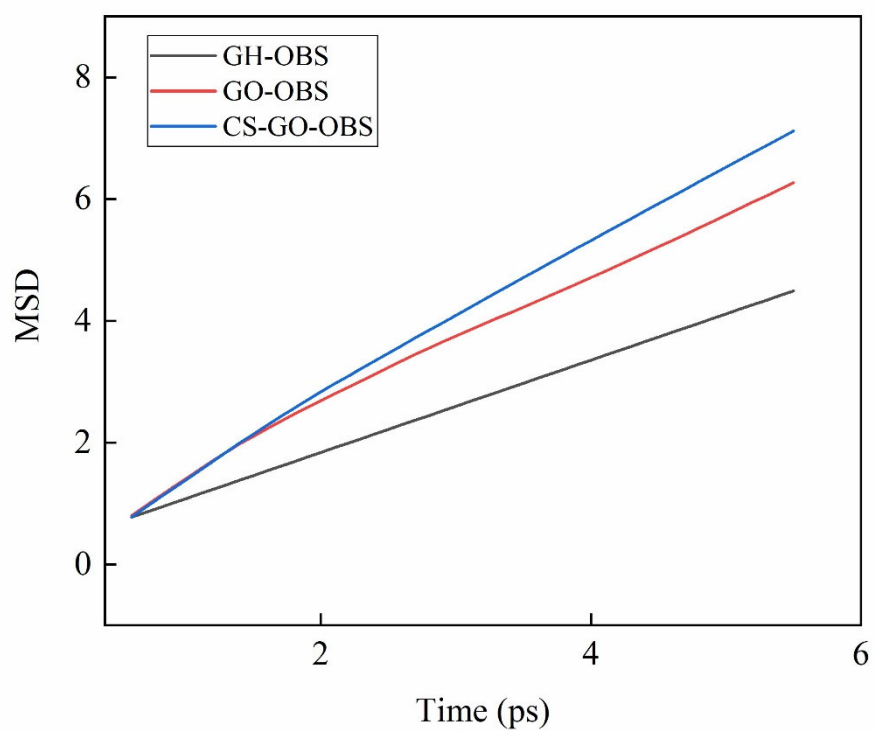

Supplement: s1 [file s1]
